# Supplementary material for: Genetic inactivation of mTORC1 or mTORC2 in neurons reveals distinct functions in glutamatergic synaptic transmission
Source: eLife. 2020 Mar 3;9:e51440. doi: 10.7554/eLife.51440 (PMC7080408; doi:10.7554/eLife.51440)
Supplement: Figure 1—source data 1. [file elife-51440-fig1-data1.xlsx]

## Sheet: Sheet1
			Ric CTL			Ric CRE					Rap CTL			Rap CRE
			1	2	3	1	2	3			1	2	3	1	2	3
	exposure quanted
	Raw Pixel Values	Ric	21.053	13.48	11.566	6.77	5.803	6.099	15s	Ric	19.449	21.544	16.397	8.059	7.507	8.353
		TUBB	160.021	153.268	155.466	156.332	152.011	143.987		TUBB	127.416	125.632	139.068	127.382	127.895	130.253		Mean							StErr
		GAPDH	111.082	102.336	100.102	107.218	112.839	101.204		GAPDH	118.068	105.296	116.25	110.369	114.018	110.361
																			Rictor			Raptor				Rictor			Raptor
																			CTL	CRE		CTL	CRE			CTL	CRE		CTL	CRE
	Loading Normalized	Tub Norm	0.131564	0.0879505	0.0743957	0.0433053	0.0381749	0.042358			0.152642	0.171485	0.117906	0.0632664	0.0586966	0.064129		Tub Norm	0.0979701	0.0412794		0.147344	0.0620307		Tub Norm	0.0172467	0.00157616		0.015692	0.00168554
		GAPDH Norm	0.189527	0.131723	0.115542	0.0631424	0.0514273	0.0602644			0.164727	0.204604	0.141049	0.0730187	0.0658405	0.075688		GAPDH Norm	0.145597	0.058278		0.170127	0.0715157		GAPDH Norm	0.0224559	0.00352469		0.0185443	0.00294038
		Both Norm	0.155314	0.105476	0.0905121	0.0513755	0.043821	0.049749			0.0792272	0.0932931	0.0642219	0.0338968	0.0310318	0.0347154		Both Norm	0.1171	0.0483152		0.0789141	0.0332147		Both Norm	0.0195888	0.00229559		0.00839361	0.00111671
		Rictor Tub Norm					Raptor Tubb Norm
		t-Test: Two-Sample Assuming Equal Variances					t-Test: Two-Sample Assuming Equal Variances
			Variable 1	Variable 2				Variable 1	Variable 2
		Mean	0.0979701	0.0412794			Mean	0.147344	0.0620307
		Variance	0.000892347	7.45282e-06			Variance	0.000738714	8.52314e-06
		Observations	3	3			Observations	3	3
		Pooled Variance	0.0004499				Pooled Variance	0.000373619
		Hypothesized Mean Difference	0				Hypothesized Mean Difference	0
		df	4				df	4
		t Stat	3.2734				t Stat	5.40568
		P(T<=t) one-tail	0.0153453				P(T<=t) one-tail	0.00283537
		t Critical one-tail	2.13185				t Critical one-tail	2.13185
		P(T<=t) two-tail	0.0306907				P(T<=t) two-tail	0.00567074
		t Critical two-tail	2.77645				t Critical two-tail	2.77645
		Rictor Gap Norm					Raptor GAP Norm
		t-Test: Two-Sample Assuming Equal Variances					t-Test: Two-Sample Assuming Equal Variances
			Variable 1	Variable 2				Variable 1	Variable 2
		Mean	0.145597	0.058278			Mean	0.170127	0.0715157
		Variance	0.0015128	3.72704e-05			Variance	0.00103167	2.59375e-05
		Observations	3	3			Observations	3	3
		Pooled Variance	0.000775035				Pooled Variance	0.000528803
		Hypothesized Mean Difference	0				Hypothesized Mean Difference	0
		df	4				df	4
		t Stat	3.84145				t Stat	5.252
		P(T<=t) one-tail	0.00921836				P(T<=t) one-tail	0.00314431
		t Critical one-tail	2.13185				t Critical one-tail	2.13185
		P(T<=t) two-tail	0.0184367				P(T<=t) two-tail	0.00628862
		t Critical two-tail	2.77645				t Critical two-tail	2.77645
		Rictor Both Norm					Raptor Both Norm
		t-Test: Two-Sample Assuming Equal Variances					t-Test: Two-Sample Assuming Equal Variances
			Variable 1	Variable 2				Variable 1	Variable 2
		Mean	0.1171	0.0483152			Mean	0.0789141	0.0332147
		Variance	0.00115116	1.58092e-05			Variance	0.000211358	3.7411e-06
		Observations	3	3			Observations	3	3
		Pooled Variance	0.000583486				Pooled Variance	0.00010755
		Hypothesized Mean Difference	0				Hypothesized Mean Difference	0
		df	4				df	4
		t Stat	3.4876				t Stat	5.39699
		P(T<=t) one-tail	0.0125888				P(T<=t) one-tail	0.00285182
		t Critical one-tail	2.13185				t Critical one-tail	2.13185
		P(T<=t) two-tail	0.0251777				P(T<=t) two-tail	0.00570363
		t Critical two-tail	2.77645				t Critical two-tail	2.77645
