# Supplementary material for: Genetic inactivation of mTORC1 or mTORC2 in neurons reveals distinct functions in glutamatergic synaptic transmission
Source: eLife. 2020 Mar 3;9:e51440. doi: 10.7554/eLife.51440 (PMC7080408; doi:10.7554/eLife.51440)
Supplement: Figure 4—source data 1. [file elife-51440-fig4-data1.xlsx]

## Sheet: Sheet1
Cell ID	Genotype	Interval (ms)	PP ratio		Genotype 1= Raptor-Con, 2= Raptor-KO
1	1	25	1.09
1	1	50	1.04
1	1	100	0.98
1	1	200	1.04
2	1	25	0.98
2	1	50	1.06
2	1	100	1.03
2	1	200	1.02
3	1	25	0.84
3	1	50	0.81
3	1	100	0.92
3	1	200	0.88
4	1	25	1.07
4	1	50	1.11
4	1	100	1.06
4	1	200	1.13
5	1	25	0.3
5	1	50	0.31
5	1	100	0.39
5	1	200	0.49
6	1	25	0.92
6	1	50	0.88
6	1	100	0.99
6	1	200	0.99
7	1	25	1.39
7	1	50	1.13
7	1	100	1.07
7	1	200	1.05
8	1	25	2.45
8	1	50	1.8
8	1	100	1.57
8	1	200
9	1	25	1
9	1	50	1.16
9	1	100	1.07
9	1	200	1.01
10	1	25	0.63
10	1	50	0.71
10	1	100	0.75
10	1	200	0.79
11	1	25	1.55
11	1	50	1.36
11	1	100	1.33
11	1	200	1.06
12	1	25	1.27
12	1	50	0.96
12	1	100	0.76
12	1	200	0.79
13	1	25	0.88
13	1	50	1.24
13	1	100	0.85
13	1	200	0.73
14	1	25	0.76
14	1	50	0.82
14	1	100	0.87
14	1	200	0.63
15	1	25	1.23
15	1	50	1.18
15	1	100	1.11
15	1	200	0.89
16	1	25	0.8
16	1	50	0.87
16	1	100	0.79
16	1	200	0.81
38	1	25	0.92
38	1	50	0.84
38	1	100	0.8
38	1	200	0.71
39	1	25	1.49
39	1	50	1.55
39	1	100	1.05
39	1	200	0.92
40	1	25	0.98
40	1	50	0.98
40	1	100	0.86
40	1	200	0.9
46	1	25	1.17
46	1	50	1.12
46	1	100	0.95
46	1	200	0.93
47	1	25	0.7
47	1	50	0.71
47	1	100	0.67
47	1	200	0.62
13716209	1	25	1.43
13716209	1	50	1.3
13716209	1	100	1.04
13716209	1	200	0.81
13716222	1	25	1.4
13716222	1	50	1.43
13716222	1	100	1.01
13716222	1	200	0.96
13717022	1	25	1.51
13717022	1	50	1.43
13717022	1	100	0.86
13717022	1	200	0.67
13717035	1	25	1.14
13717035	1	50	1.05
13717035	1	100	0.85
13717035	1	200	0.88
17	2	25	1.21
17	2	50	1.19
17	2	100	1.1
17	2	200	0.99
18	2	25	0.91
18	2	50	1
18	2	100	0.96
18	2	200	1.06
19	2	25	1.02
19	2	50	1.1
19	2	100	0.95
19	2	200	1.08
20	2	25	0.87
20	2	50	0.95
20	2	100	0.87
20	2	200	0.98
21	2	25	0.76
21	2	50	0.72
21	2	100	0.79
21	2	200	0.78
22	2	25	1
22	2	50	0.97
22	2	100	0.93
22	2	200	1.09
23	2	25	0.98
23	2	50	1.03
23	2	100	0.98
23	2	200	0.89
24	2	25	0.88
24	2	50	0.96
24	2	100	0.97
24	2	200	1.05
25	2	25	1.03
25	2	50	1.08
25	2	100	1.03
25	2	200	1.1
26	2	25	0.96
26	2	50	1.45
26	2	100	1.29
26	2	200	0.61
27	2	25	1.04
27	2	50	0.93
27	2	100	1.1
27	2	200	0.92
28	2	25	0.41
28	2	50	0.29
28	2	100	0.3
28	2	200	0.2
29	2	25	1.2
29	2	50	0.78
29	2	100	0.66
29	2	200	1.1
30	2	25	0.79
30	2	50	0.91
30	2	100	0.93
30	2	200	0.6
31	2	25	1.08
31	2	50	1.09
31	2	100	0.73
31	2	200	0.81
32	2	25	2.21
32	2	50	2.07
32	2	100	0.46
32	2	200	1.07
33	2	25	1.45
33	2	50	1.87
33	2	100	0.9
33	2	200	1.12
34	2	25	1.04
34	2	50	1.28
34	2	100	1.19
34	2	200	0.91
35	2	25	1.41
35	2	50	1.18
35	2	100	0.95
35	2	200	1.26
36	2	25	0.96
36	2	50	0.87
36	2	100	0.78
36	2	200	1
37	2	25	0.93
37	2	50	1.76
37	2	100	1.16
37	2	200	1.24
41	2	25	1.59
41	2	50	1.57
41	2	100	0.97
41	2	200	1.23
42	2	25	1.18
42	2	50	1.25
42	2	100	0.95
42	2	200	0.83
43	2	25	1.13
43	2	50	1.31
43	2	100	0.8
43	2	200	1.34
44	2	25
44	2	50	1.21
44	2	100	1.24
44	2	200	0.76
45	2	25	1.43
45	2	50	1.2
45	2	100	0.92
45	2	200	0.99
13717051	2	25	1.03
13717051	2	50	1.06
13717051	2	100	1.23
13717051	2	200	1.14
13717074	2	25	1.4
13717074	2	50	1.43
13717074	2	100	0.81
13717074	2	200	0.89
