# Supplementary material for: Genetic inactivation of mTORC1 or mTORC2 in neurons reveals distinct functions in glutamatergic synaptic transmission
Source: eLife. 2020 Mar 3;9:e51440. doi: 10.7554/eLife.51440 (PMC7080408; doi:10.7554/eLife.51440)
Supplement: Figure 4—source data 2. [file elife-51440-fig4-data2.xlsx]

## Sheet: Sheet1
Cell ID	Genotype	Interval (ms)	PP ratio		Genotype 1= Rictor-Con, 2= Rictor-KO
1	1	25
1	1	50	0.33
1	1	100	0.39
1	1	200	0.32
2	1	25
2	1	50	0.56
2	1	100	0.68
2	1	200	0.77
3	1	25
3	1	50	0.35
3	1	100	0.47
3	1	200	0.59
4	1	25
4	1	50	0.46
4	1	100	0.53
4	1	200	0.51
5	1	25
5	1	50	0.47
5	1	100	0.46
5	1	200	0.46
6	1	25
6	1	50	1.12
6	1	100	1.02
6	1	200	0.77
7	1	25
7	1	50	0.83
7	1	100	0.8
7	1	200	0.74
8	1	25
8	1	50	0.6
8	1	100	0.9
8	1	200	0.8
9	1	25
9	1	50	0.71
9	1	100	0.69
9	1	200	0.77
10	1	25
10	1	50	0.9
10	1	100	0.86
10	1	200	0.89
11	1	25
11	1	50	0.71
11	1	100	0.81
11	1	200	0.83
12	1	25
12	1	50	0.87
12	1	100	0.92
12	1	200	0.9
13	1	25
13	1	50	1.03
13	1	100	0.85
13	1	200	0.76
14	1	25
14	1	50	1.03
14	1	100	1.02
14	1	200	1.15
15	1	25
15	1	50	1.1
15	1	100	1.15
15	1	200	1.04
16	1	25
16	1	50	0.97
16	1	100	0.95
16	1	200	0.92
17	1	25
17	1	50	1
17	1	100	0.93
17	1	200	0.88
18	1	25
18	1	50	0.77
18	1	100	0.82
18	1	200	0.81
19	1	25
19	1	50	0.62
19	1	100	0.67
19	1	200	0.82
20	1	25
20	1	50	1.1
20	1	100	0.94
20	1	200	0.98
21	1	25
21	1	50	1.06
21	1	100	0.9
21	1	200	0.92
22	1	25
22	1	50	0.93
22	1	100	0.78
22	1	200	0.89
23	1	25
23	1	50	1.12
23	1	100	1.01
23	1	200	0.92
24	1	25
24	1	50	0.95
24	1	100	0.93
24	1	200	0.84
25	1	25	1.12
25	1	50	0.95
25	1	100	0.86
25	1	200	0.97
26	1	25
26	1	50	1.08
26	1	100	1.14
26	1	200	0.94
27	1	25	1.12
27	1	50	1.16
27	1	100	1.14
27	1	200	1.05
28	1	25	1.05
28	1	50	0.57
28	1	100	0.57
28	1	200	0.69
29	1	25	1
29	1	50	1.17
29	1	100	1.18
29	1	200	0.93
30	1	25	1.47
30	1	50	0.97
30	1	100	0.98
30	1	200	0.86
31	1	25	1.11
31	1	50	1.46
31	1	100	1.41
31	1	200	1.06
32	1	25	1.35
32	1	50	0.96
32	1	100	1
32	1	200	0.79
33	1	25	1.05
33	1	50	1.25
33	1	100	1.04
33	1	200	0.99
34	1	25	1.12
34	1	50	1
34	1	100	1.09
34	1	200	0.97
35	1	25
35	1	50	1.16
35	1	100	1.13
35	1	200	1.08
41	2	25
41	2	50	0.77
41	2	100	0.99
41	2	200	1.15
42	2	25
42	2	50	0.99
42	2	100	0.97
42	2	200	0.8
43	2	25
43	2	50	0.76
43	2	100	0.75
43	2	200	0.73
44	2	25
44	2	50	0.52
44	2	100	0.55
44	2	200	0.74
45	2	25
45	2	50	0.95
45	2	100	1
45	2	200	0.67
46	2	25
46	2	50	0.6
46	2	100	0.63
46	2	200	0.66
47	2	25
47	2	50	1.03
47	2	100	1.08
47	2	200	0.95
48	2	25
48	2	50	0.99
48	2	100	0.56
48	2	200	0.7
49	2	25
49	2	50	0.43
49	2	100	0.53
49	2	200	0.43
410	2	25
410	2	50	1.11
410	2	100	1.07
410	2	200	0.65
411	2	25
411	2	50	1.52
411	2	100	1.25
411	2	200	1.22
412	2	25
412	2	50	0.75
412	2	100	0.84
412	2	200	0.87
413	2	25
413	2	50	0.97
413	2	100	0.96
413	2	200	1
414	2	25
414	2	50	0.6
414	2	100	0.96
414	2	200	1.01
415	2	25
415	2	50	1.06
415	2	100	0.91
415	2	200	0.93
416	2	25
416	2	50	0.93
416	2	100	0.94
416	2	200	1.12
417	2	25
417	2	50	1.19
417	2	100	1.19
417	2	200	1.03
418	2	25
418	2	50	1.18
418	2	100	1.43
418	2	200	1.29
419	2	25
419	2	50	1.4
419	2	100	1.02
419	2	200	1.28
420	2	25
420	2	50	0.99
420	2	100	1.01
420	2	200	0.9
421	2	25
421	2	50	0.91
421	2	100	0.99
421	2	200	1.14
422	2	25
422	2	50	1.06
422	2	100	0.98
422	2	200	1
423	2	25	1.91
423	2	50	1.02
423	2	100	1.21
423	2	200	1.03
424	2	25	1.28
424	2	50	1.34
424	2	100	1.12
424	2	200	1.11
425	2	25	1.13
425	2	50	2.21
425	2	100	1.64
425	2	200	1.27
426	2	25	1.7
426	2	50	1.42
426	2	100	1.27
426	2	200	0.89
427	2	25	1.18
427	2	50	1.69
427	2	100	1.5
427	2	200	1.14
428	2	25	1.56
428	2	50	2.4
428	2	100	2.49
428	2	200	1.31
429	2	25	3.84
429	2	50	1.32
429	2	100	1.73
429	2	200	1.11
430	2	25	1.15
430	2	50	3.15
430	2	100	2.21
430	2	200	1.97
431	2	25
431	2	50	3.75
431	2	100	3.13
431	2	200	1.32
432	2	25
432	2	50	1.12
432	2	100	1.03
432	2	200	1.03
