# Supplementary material for: Genetic inactivation of mTORC1 or mTORC2 in neurons reveals distinct functions in glutamatergic synaptic transmission
Source: eLife. 2020 Mar 3;9:e51440. doi: 10.7554/eLife.51440 (PMC7080408; doi:10.7554/eLife.51440)
Supplement: Figure 6—source data 1. [file elife-51440-fig6-data1.xlsx]

## Sheet: Sheet1
	Genotype	Ric-KO	Ric-KO	Ric-KO	Ric-KO	Ric-KO	Ric-KO	Ric-KO	Ric-KO	Ric-KO	Ric-KO	Ric-KO	Ric-KO	Ric-KO	Ric-KO	Ric-KO	Ric-KO	Ric-KO	Ric-KO	Ric-KO	Ric-KO	Ric-KO	Ric-KO	Ric-KO	Ric-KO	Ric-KO	Ric-KO	Ric-KO	Ric-KO	Ric-KO	Ric-KO	Ric-Con	Ric-Con	Ric-Con	Ric-Con	Ric-Con	Ric-Con	Ric-Con	Ric-Con	Ric-Con	Ric-Con	Ric-Con	Ric-Con	Ric-Con	Ric-Con	Ric-Con	Ric-Con	Ric-Con	Ric-Con
[Ca]ext mM
0.5		0.8	1.8	0.63	0.02	0.27	0.26	0.72	0.64	0.41	0.45	0.055	0.422	0.356	0.122	0.07	0.23	0.24	0.301	1.5	0.458											5.12	0.27	2.93	0.99	2.56	0.364	0.288	0.181	0.69	0.38	0.275	0.39	1.13	0.59	1.9	0.15	2.25
1		2.26	7.6	1.47	0.07	1.02	0.62	1.7	1.32	0.92	2.1	0.3	1.39	1.32	0.53	0.413	1.03	0.85	1.12	7.32	1.34	0.39	0.001	0.4	0.4	0.001	0.43	0.48	3.9	0.57	3.8	7.2	0.43	10.3	2.91	3.71	1.35	1.1	0.511	2	1	0.73	1.26	5.6	1.41	4.23	0.5	2.88	5.2
2		4.38	9.07	2.08	0.11	1.66	1.71	2.52	2.24	1.46	3.5	0.584	2.31	2.67	1.01	1.27	2.34	1.64	3.16	12.8	2.23	1.11	0.033	1.7	2.35	0.133	1.07	2.1	8.6	2.3	4.06	9.52	1.12	15.2	4	5.57	2.67	2.14	1.08	2.62	1.37	1	1.4	8	1.9	5.622	1	4.6	6
10		5.21	15.2	3.9	0.15	1.74	2.14	2.7	2.5	1.56	6.5	1.65	4.08	4.1	1.83	2.22	3.68	2.42	4.4	12.7	2.07	1.28	0.091	2.34	3.56	0.5	1.46	3.7	8.6	2.97	4.7	11.2	1.43	24.8	6.78	6.7	3.76	3.04	1.2	3.3	1.5	1.1	1.53	9.55	2.24	5.6	1.4	5.2	7.3
[truncated: 7 more columns]
